# Supplementary material for: Likelihood-Based Inferences under Isolation by Distance: Two-Dimensional Habitats and Confidence Intervals
Source: Oxford University Press journal article supplement (doi:10.1093/molbev/msr262), 2011-10-19

# Supplementary Material for Rousset & Leblois

Distributions of  $p$ -values, for all cases numbered as in the Tables.

Case [1]

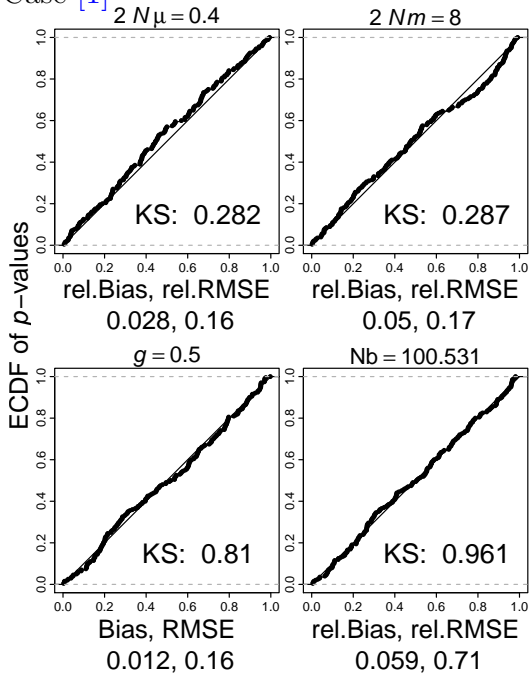

Case [2]

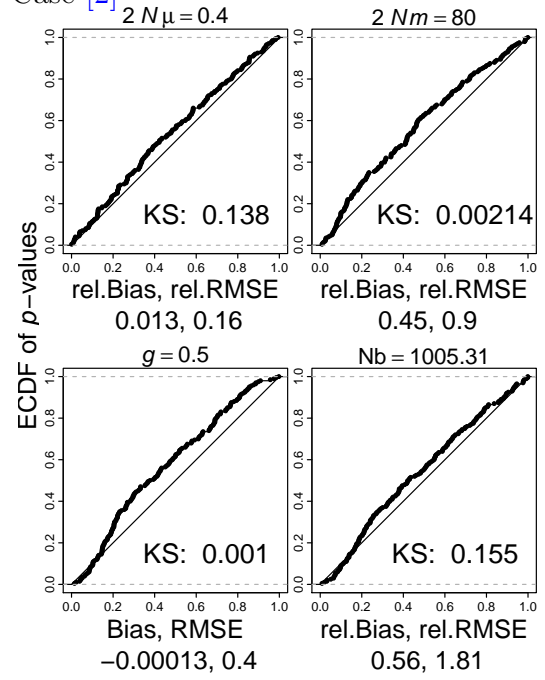

Case [3]

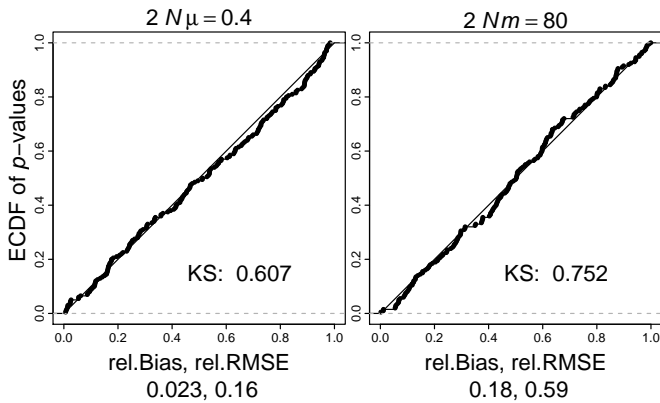

Case [4]

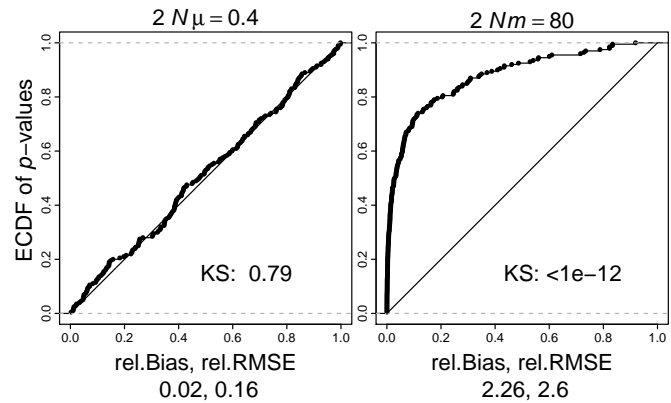

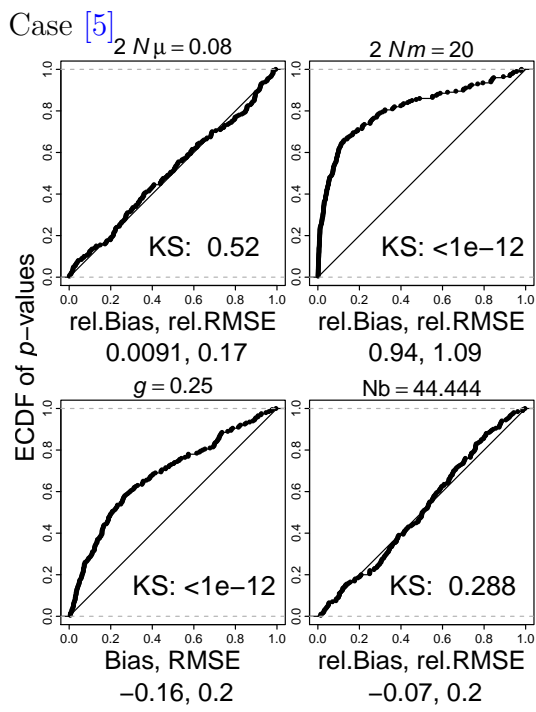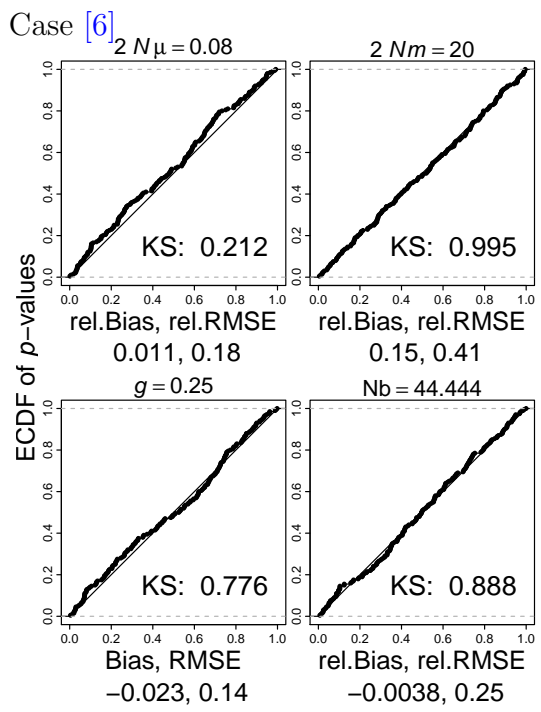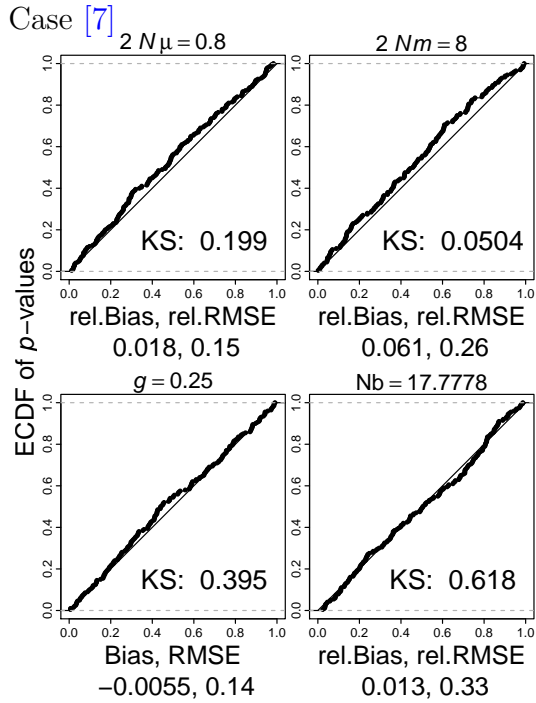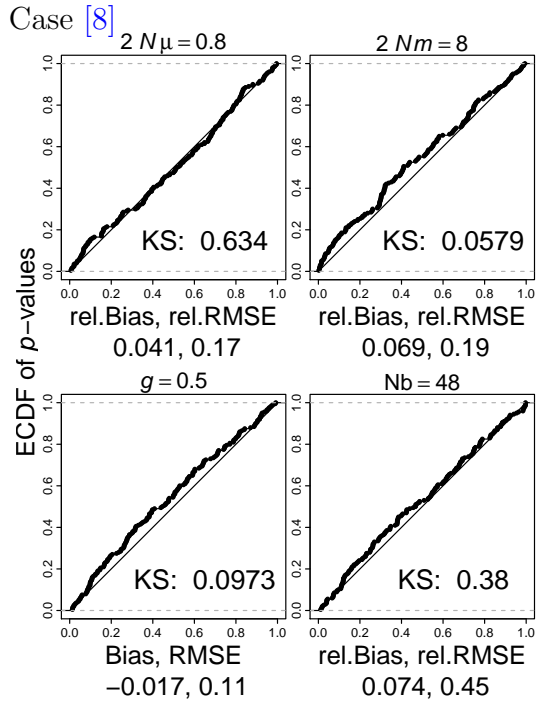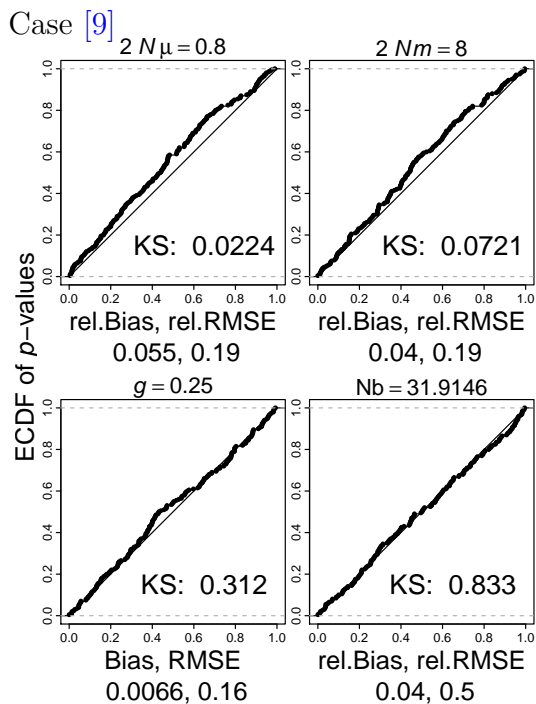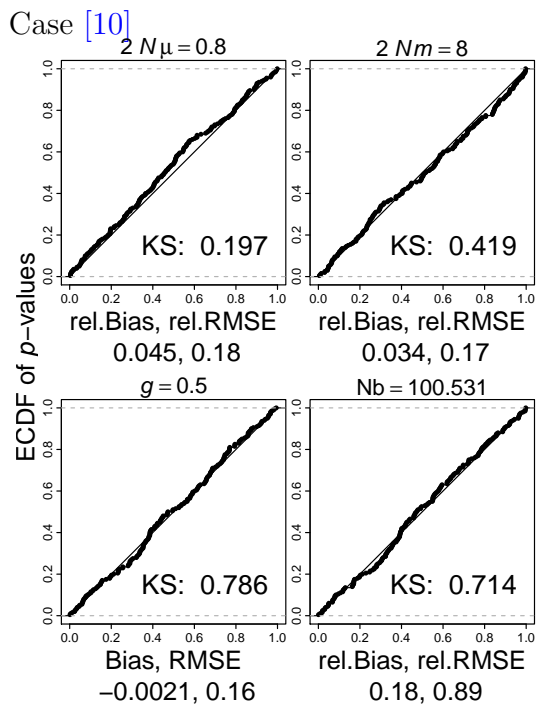

Case [11]

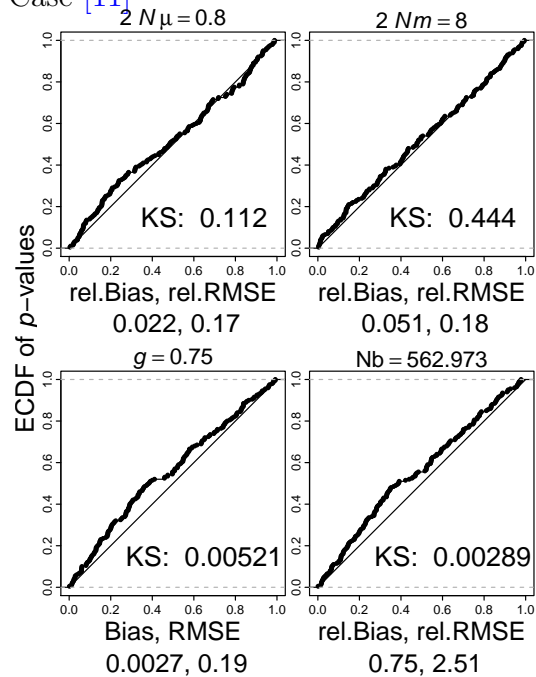

Case [12]

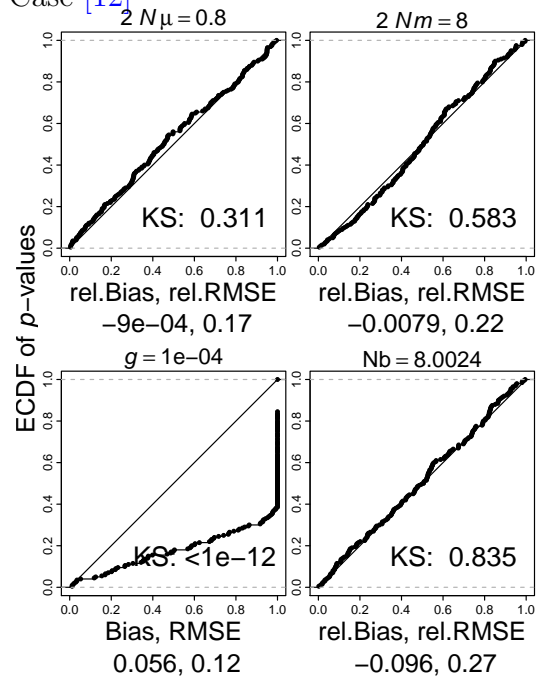

Case [13]

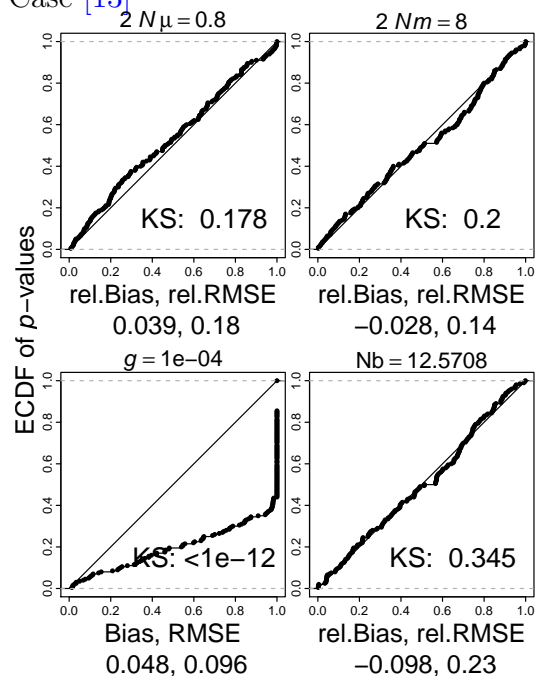

Case [14]

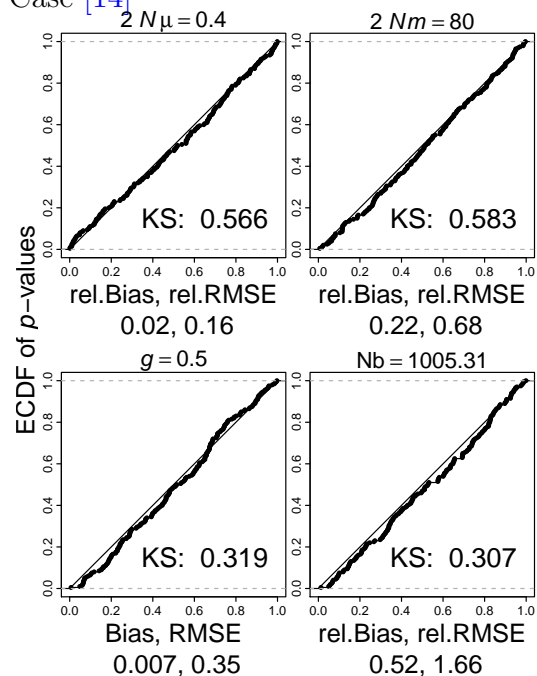

Case [15]

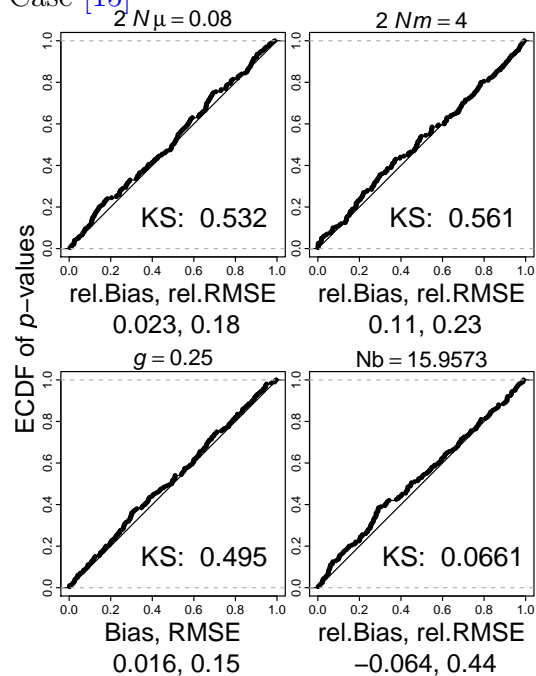

Case [16]

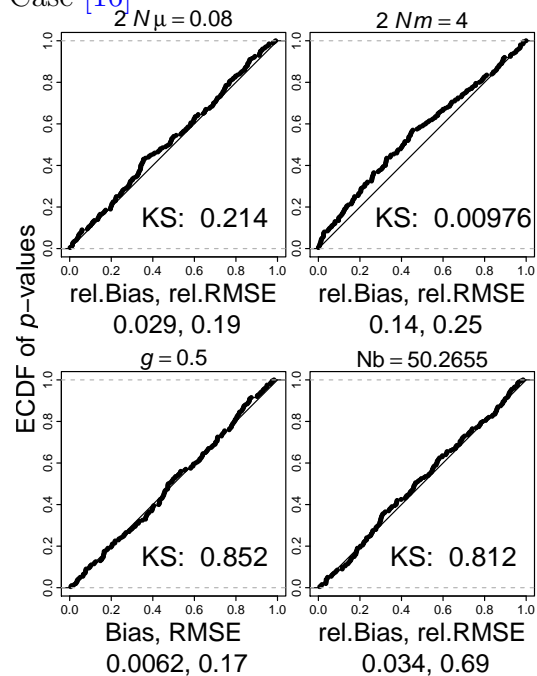

Case [17]

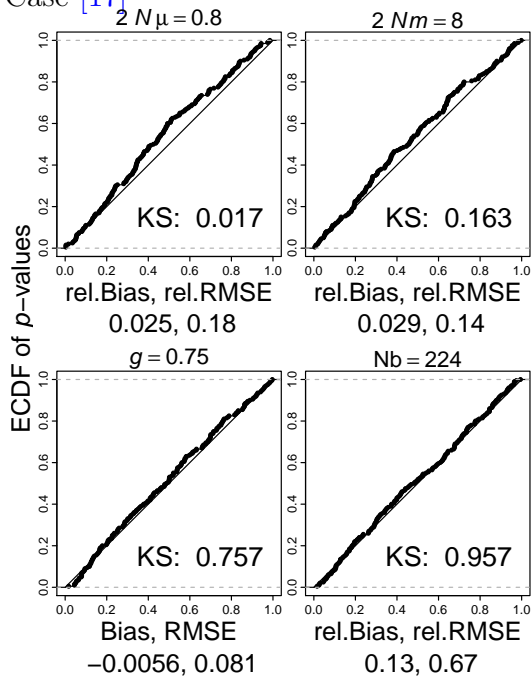

Case [18]

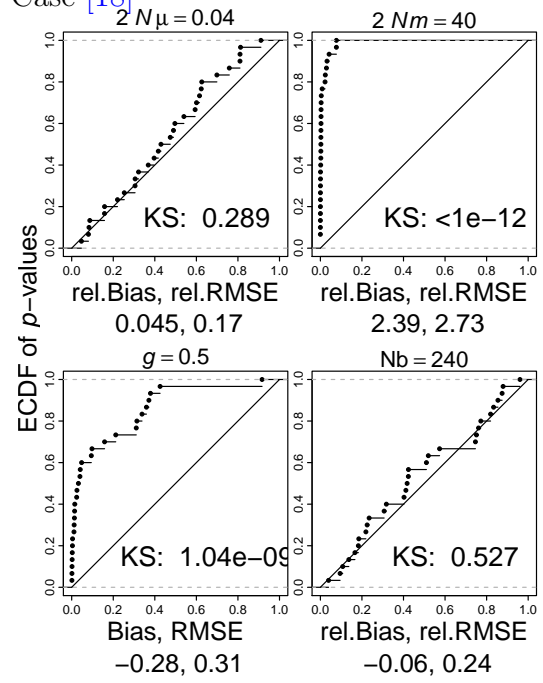

Case [19]

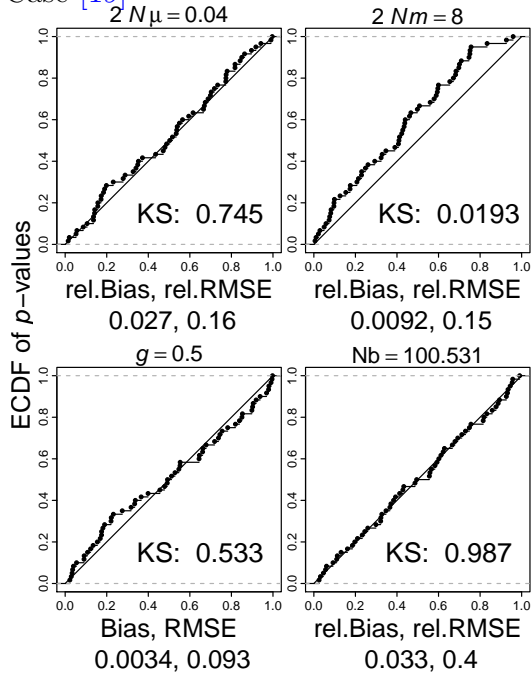

Case [20]

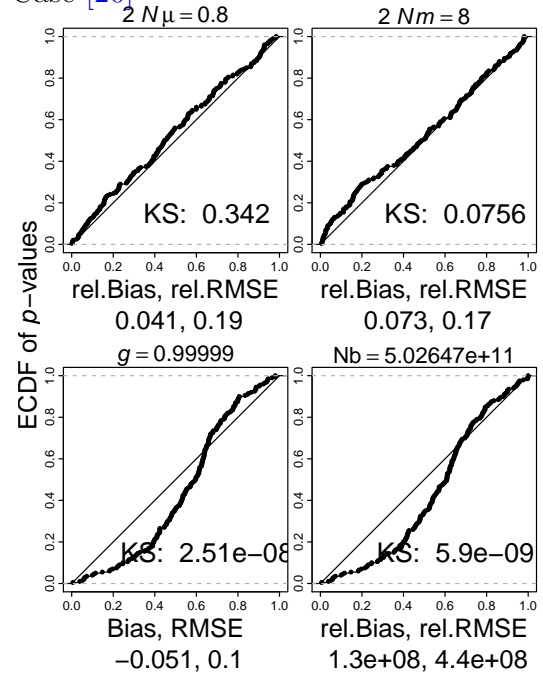

Case [21]

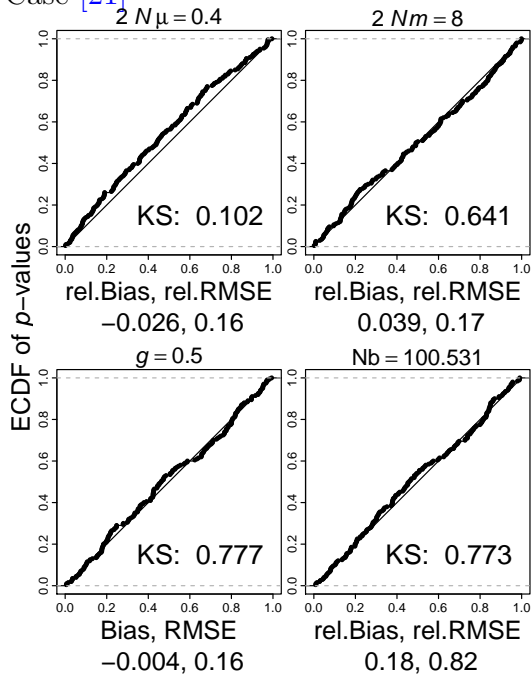

Case [22]

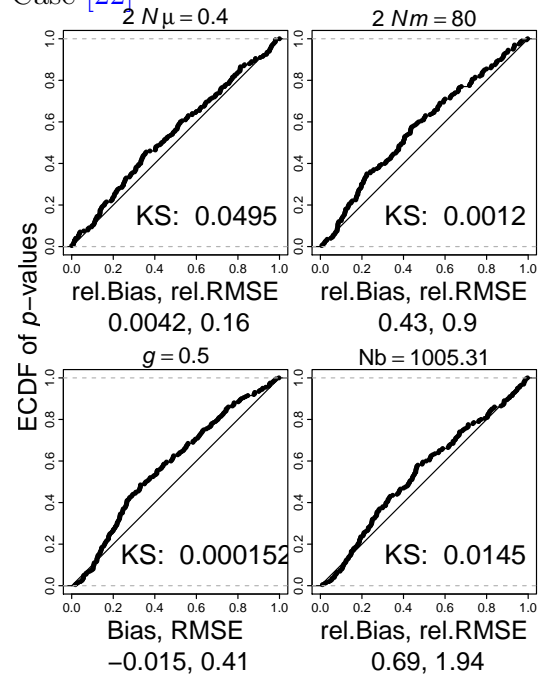

Case [23]

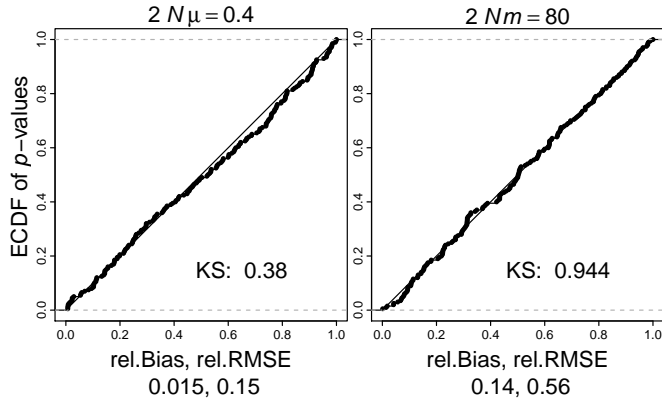

Case [24]

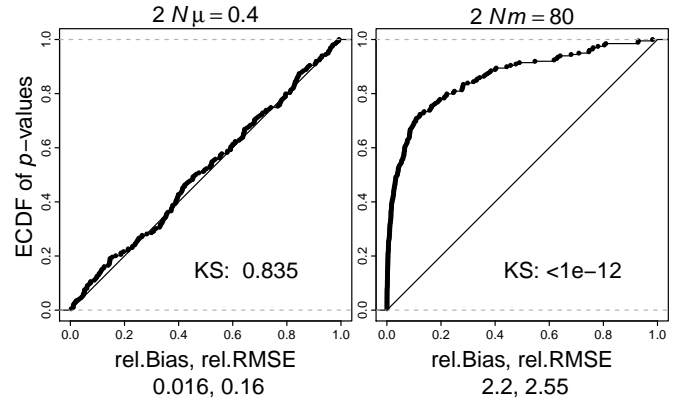

Case [25]

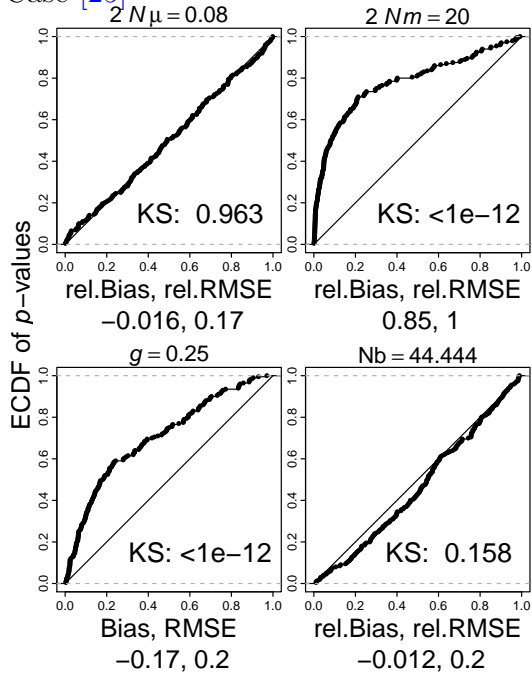

Case [26]

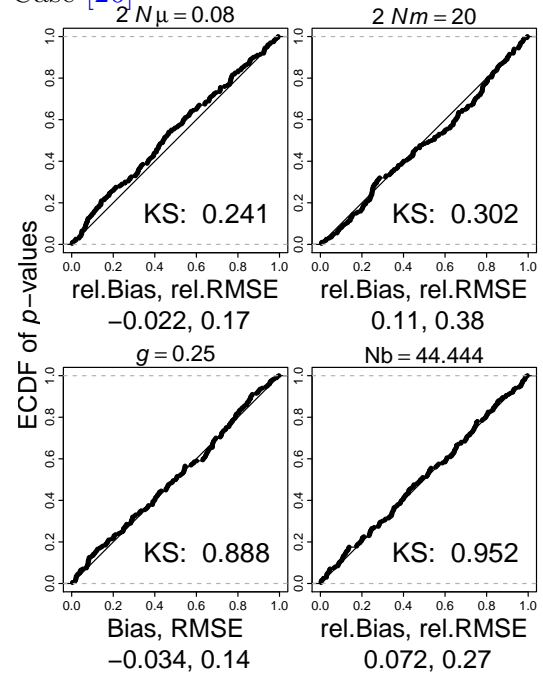

Case [27]

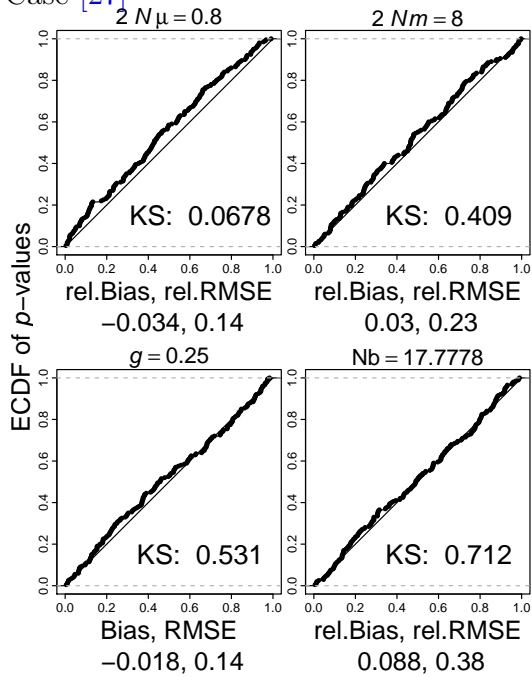

Case [28]

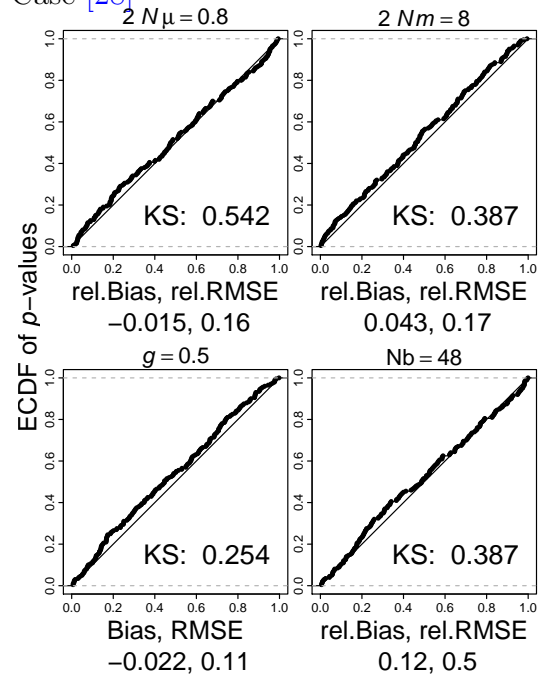

Case [29]

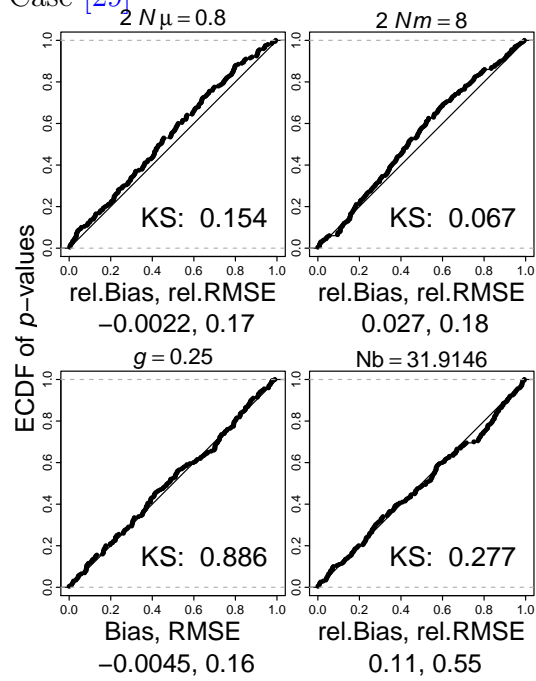

Case [30]

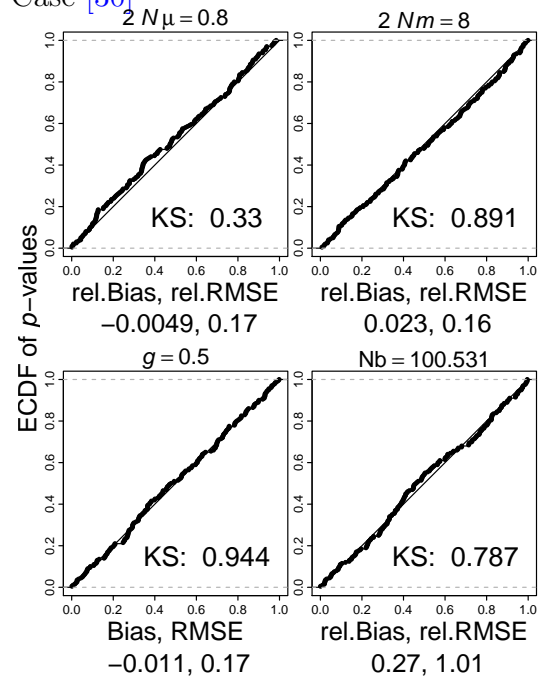

Case [31]

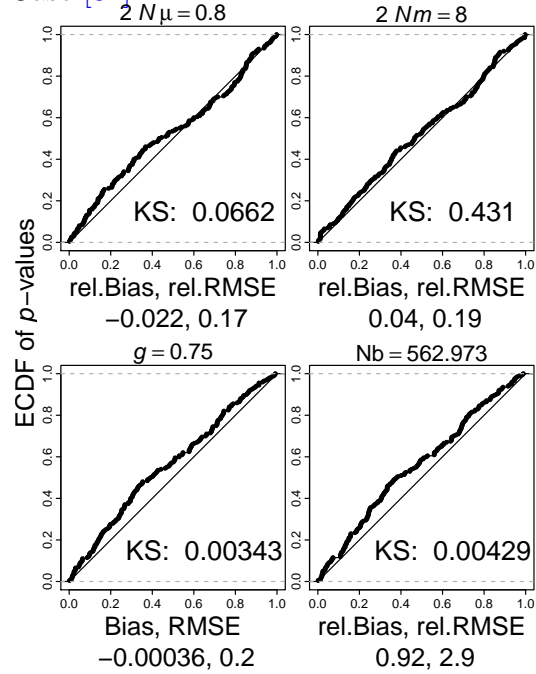

Case [32]

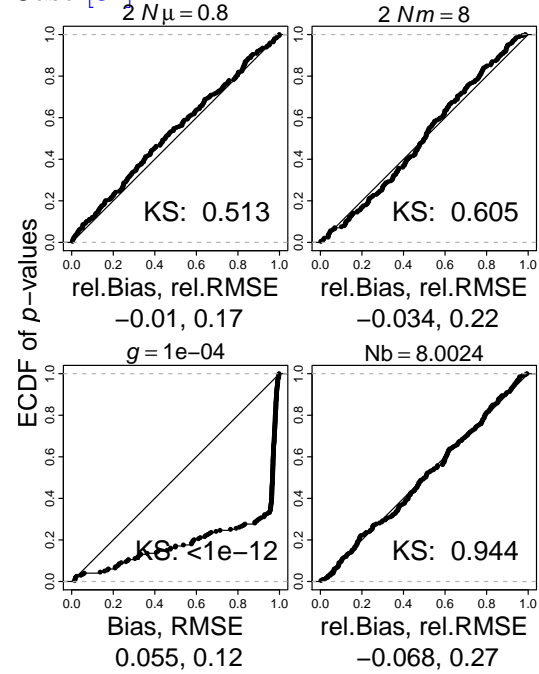

Case [33]

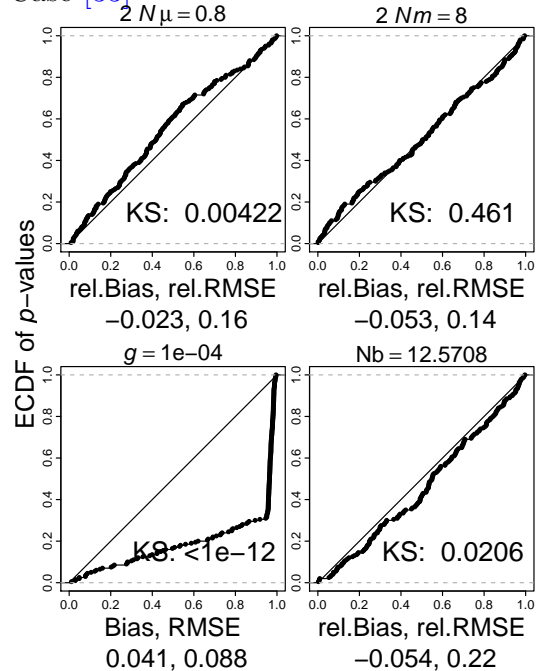

Case [34]

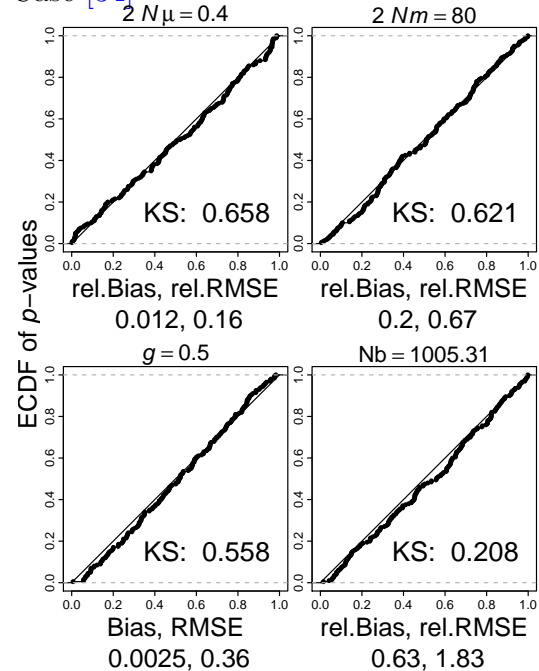

Case [35]

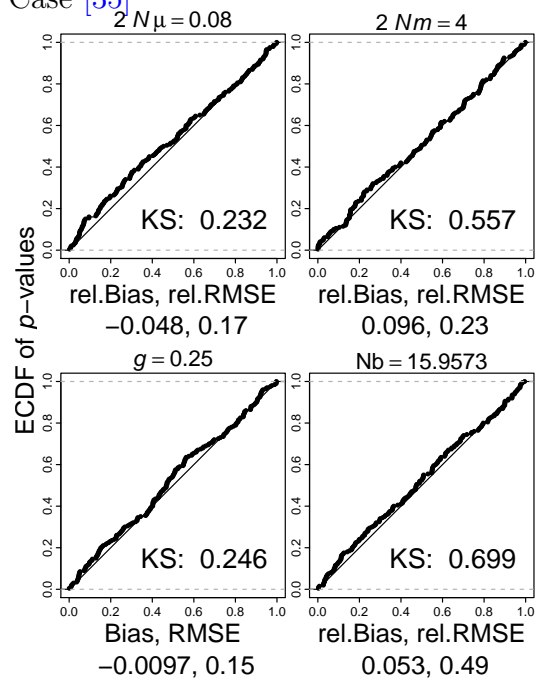

Case [36]

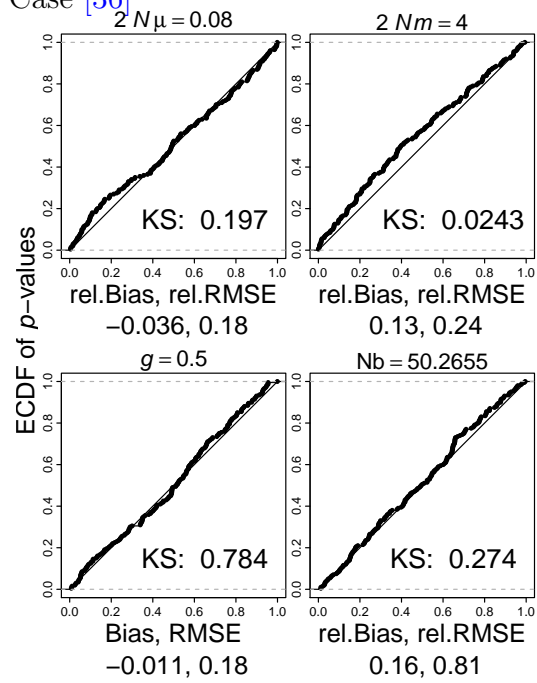

Case [37]

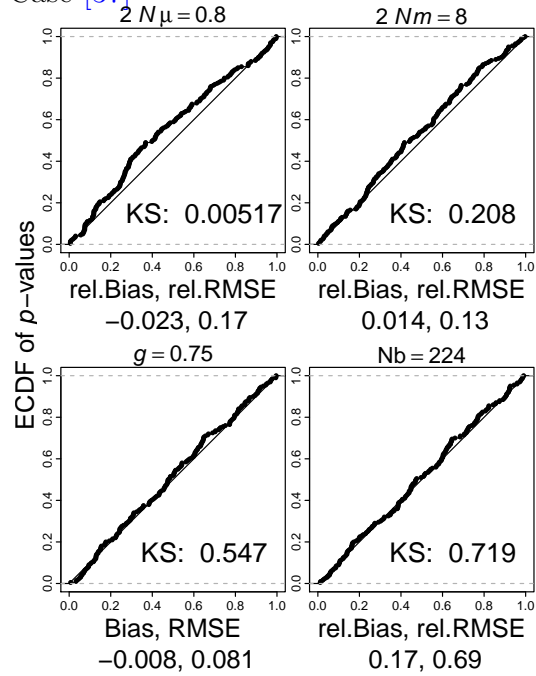

Case [38]

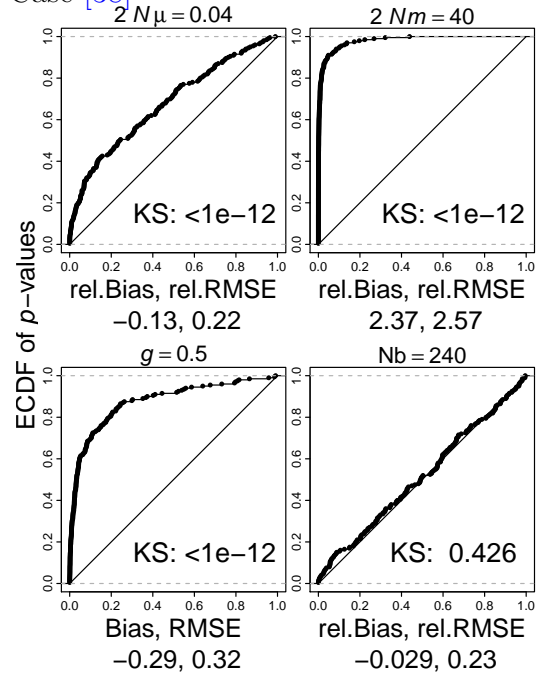

Case [39]

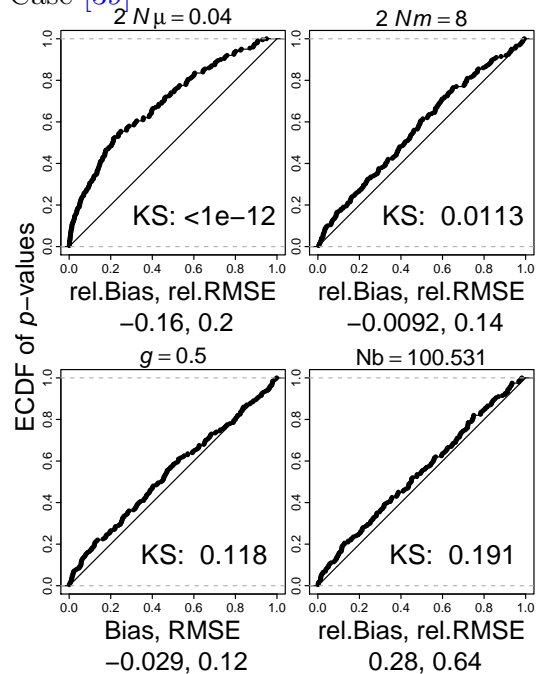

Case [40]

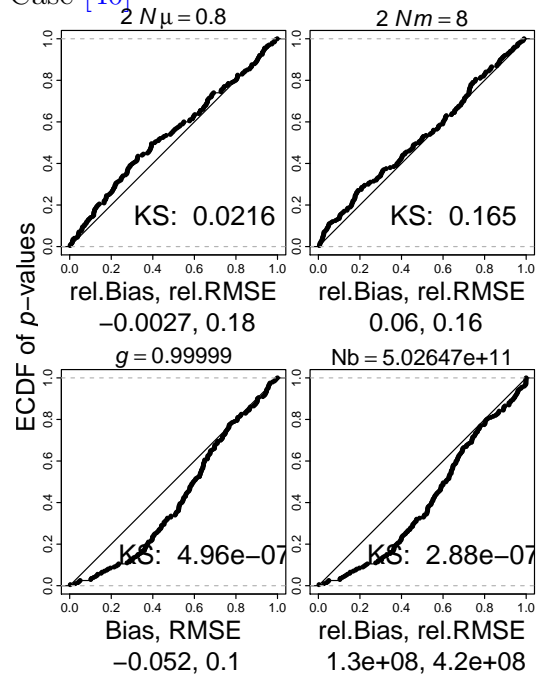

Case [41]

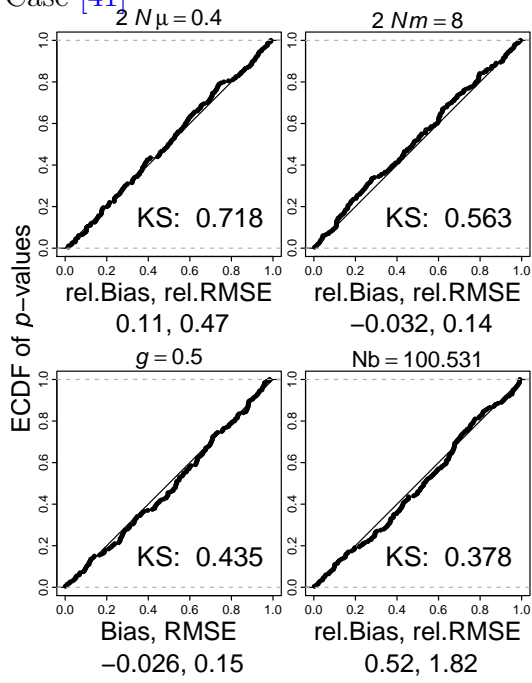

Case [42]

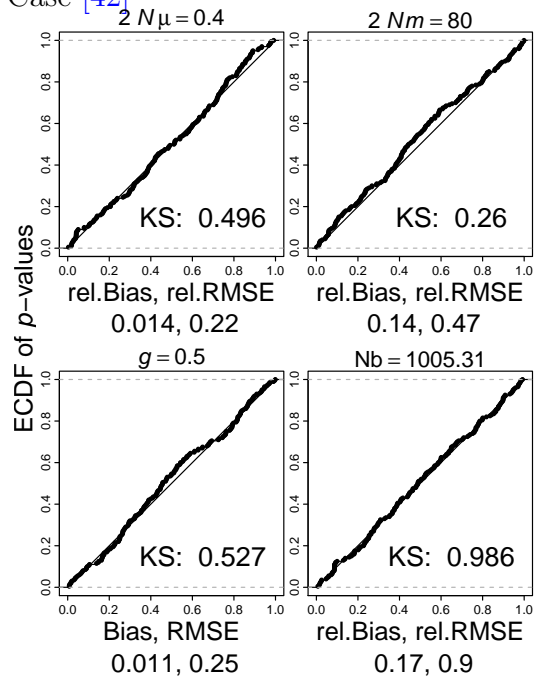

Case [43]

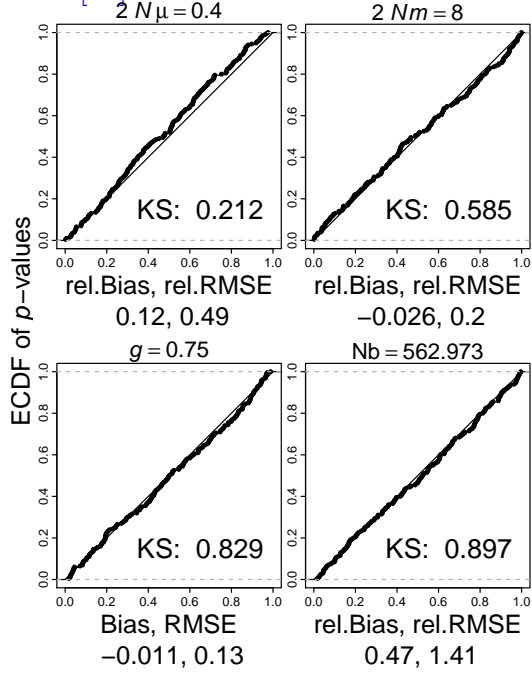

Case [44]

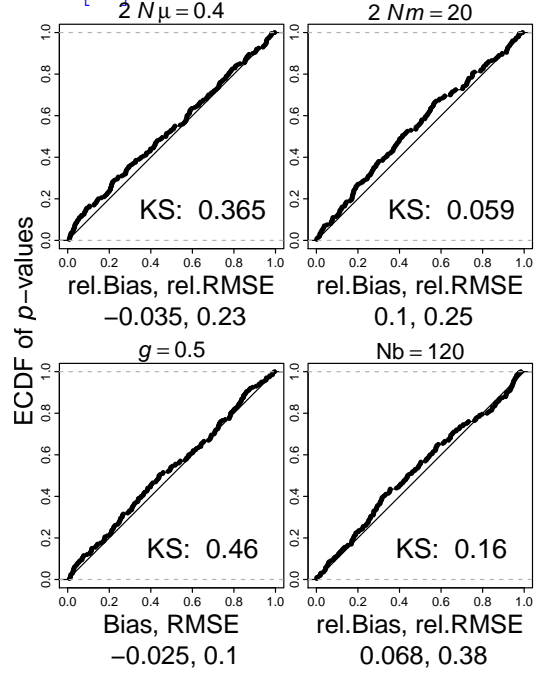

Case [45]

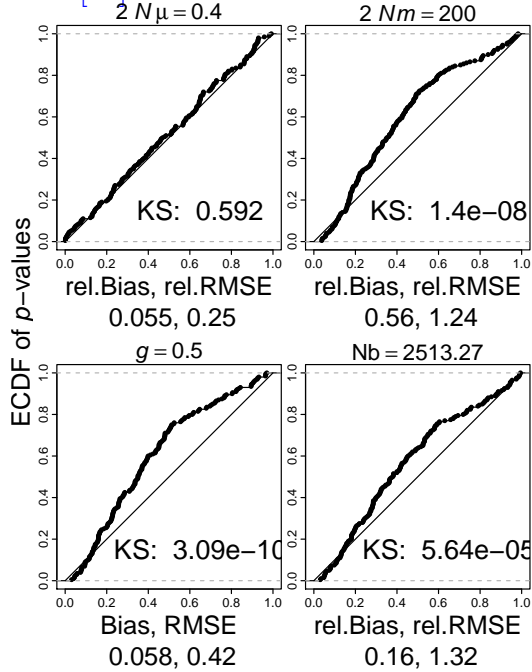

Case [46]

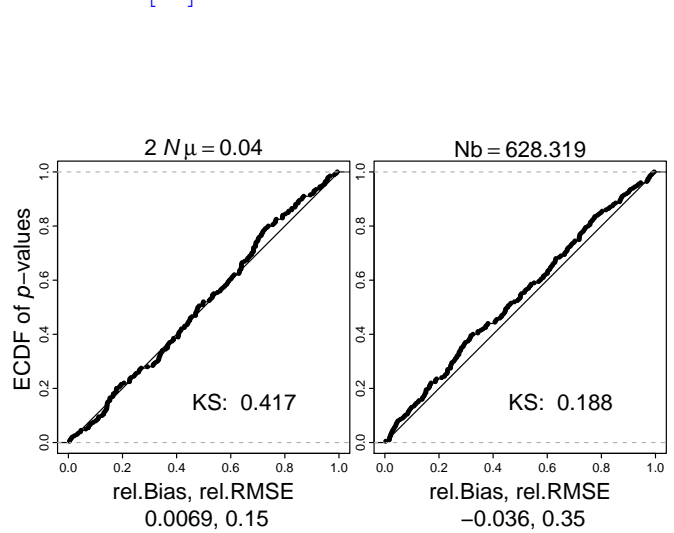



Case [47]

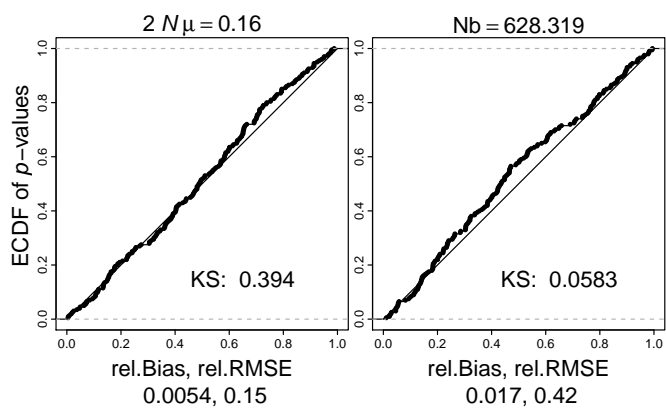

Case [48]

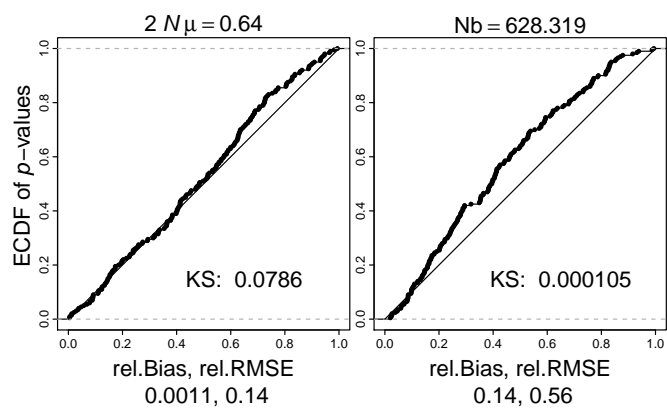

Case [49]

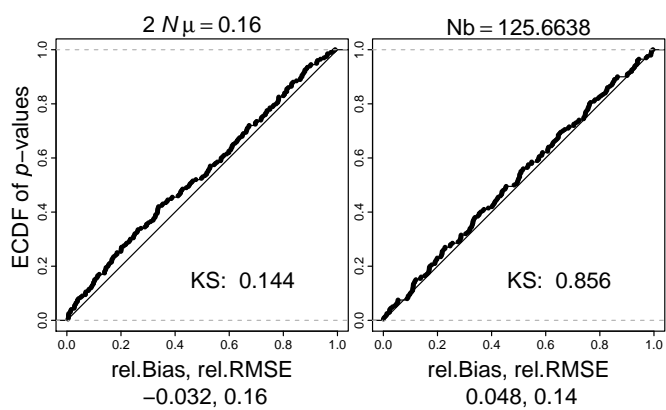

Case [50]

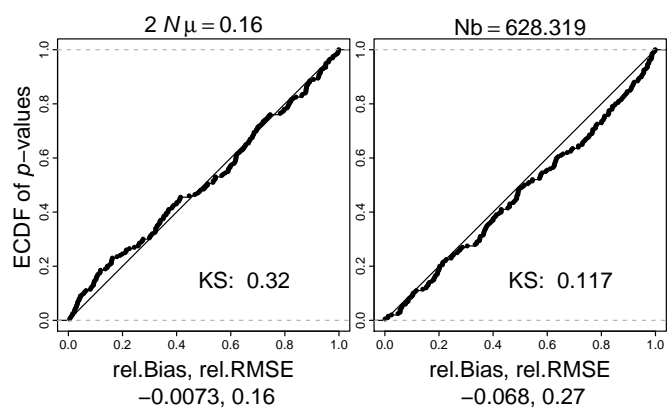

Case [51]

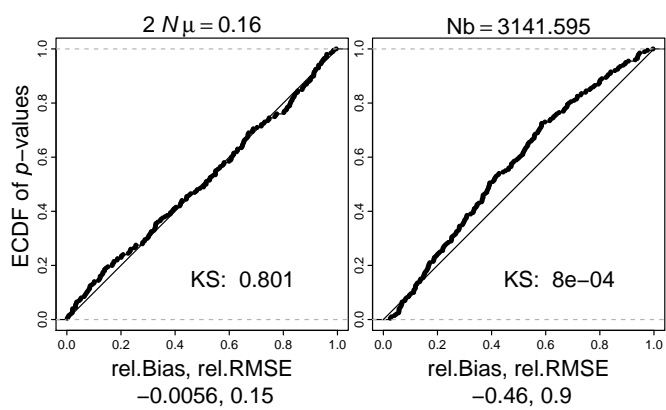

Case [52]

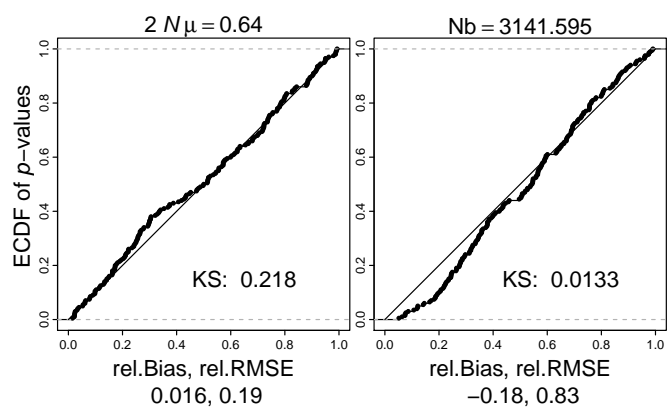

Case [53]

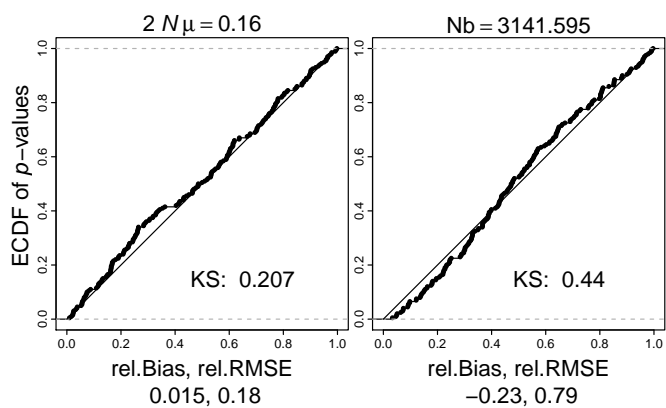

Case [54]

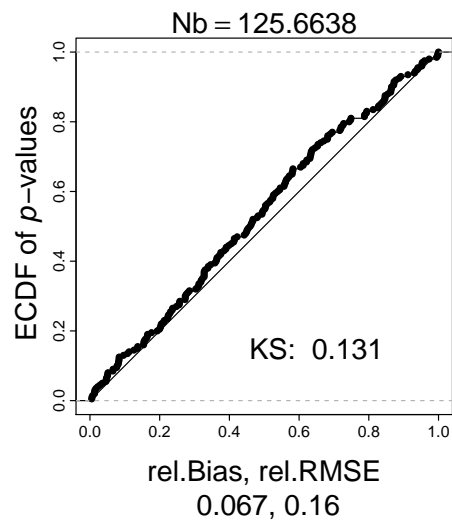

Case [55]

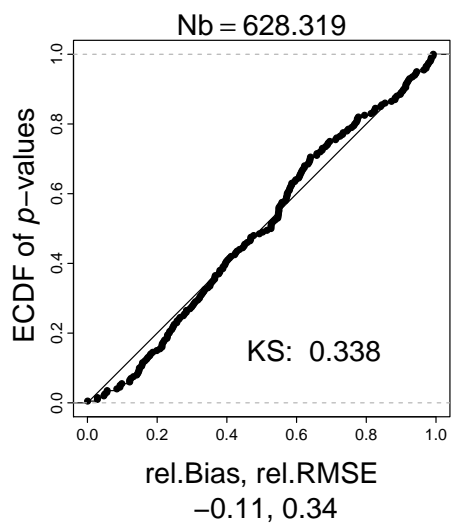

Case [56]

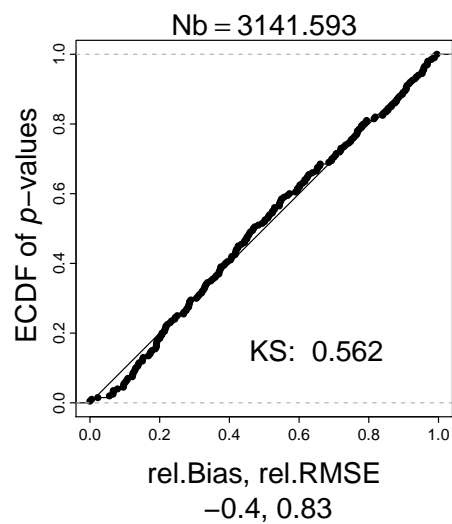

Case [57]

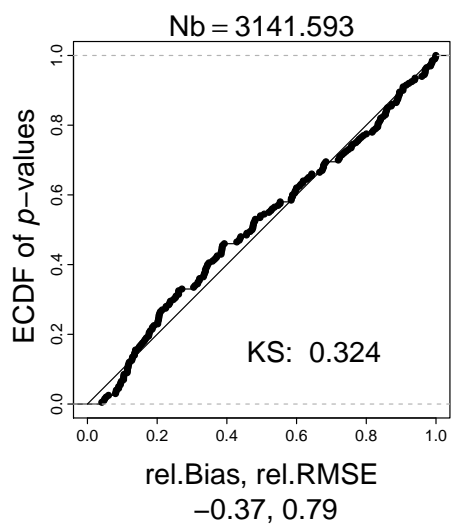

Case [58]

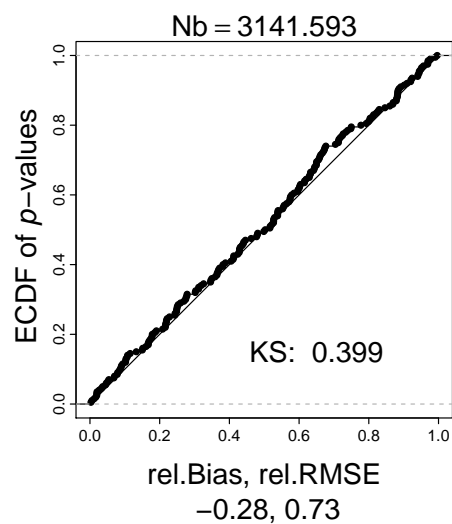

Case [59]

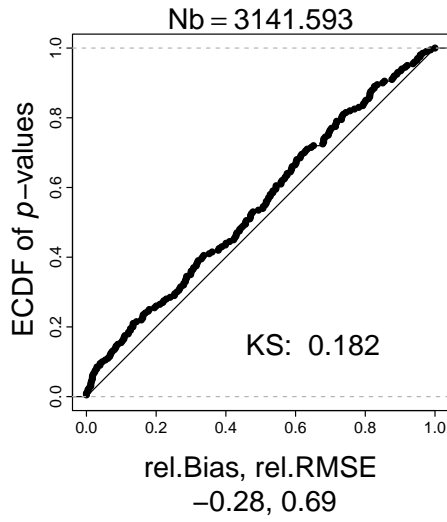

Case [60]

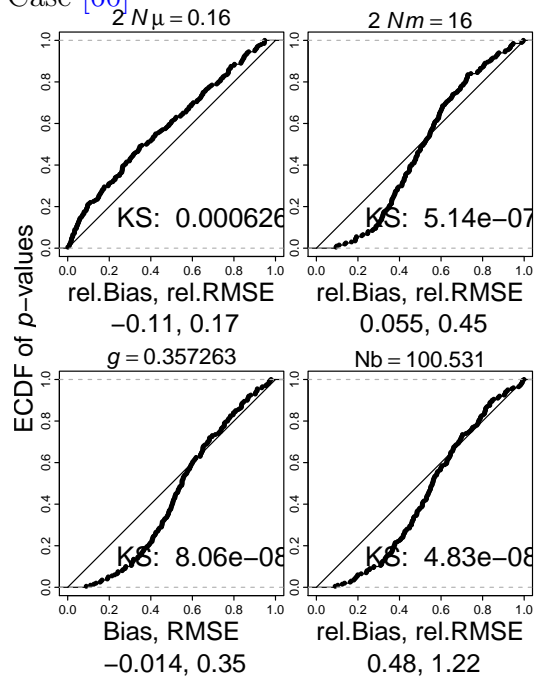

Case [61]

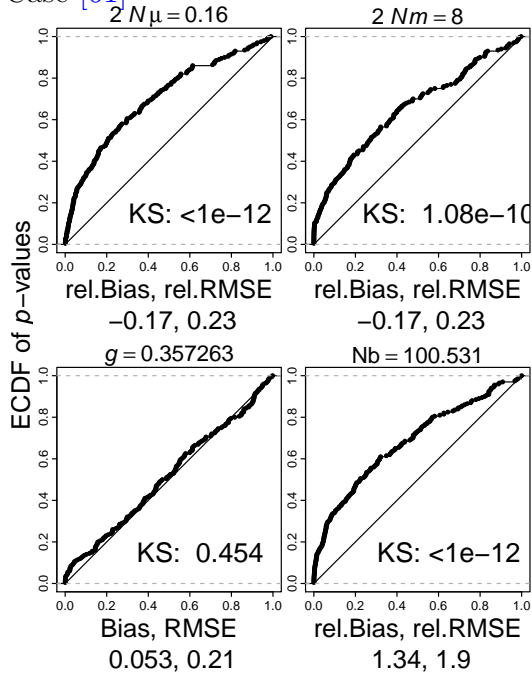

Case [62]

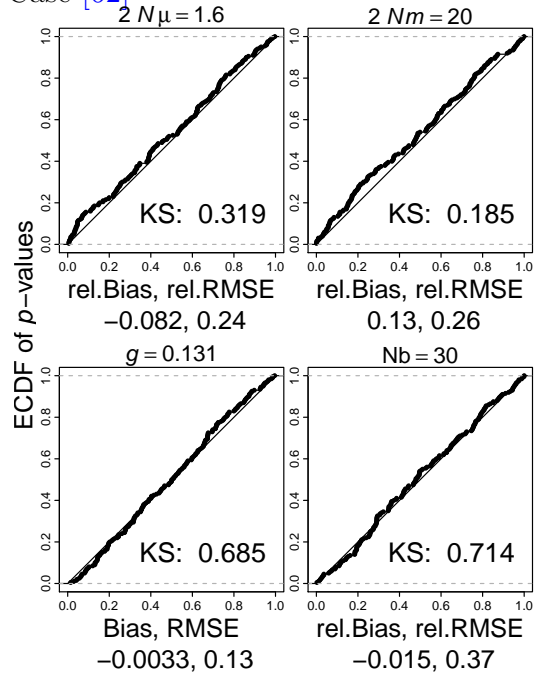

Case [63]

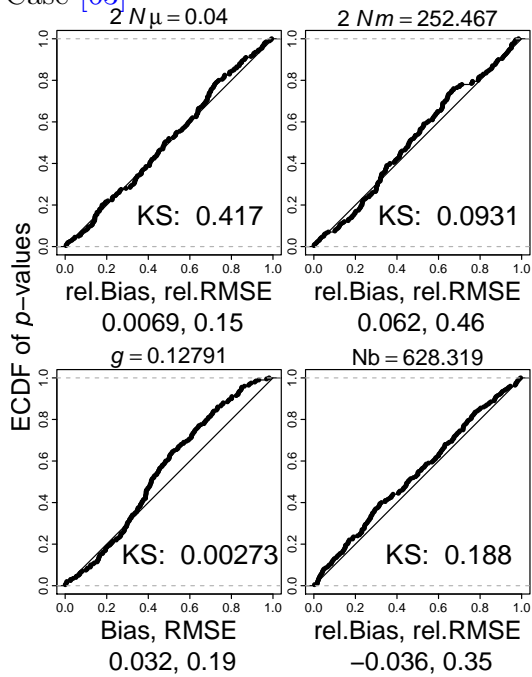

Case [64]

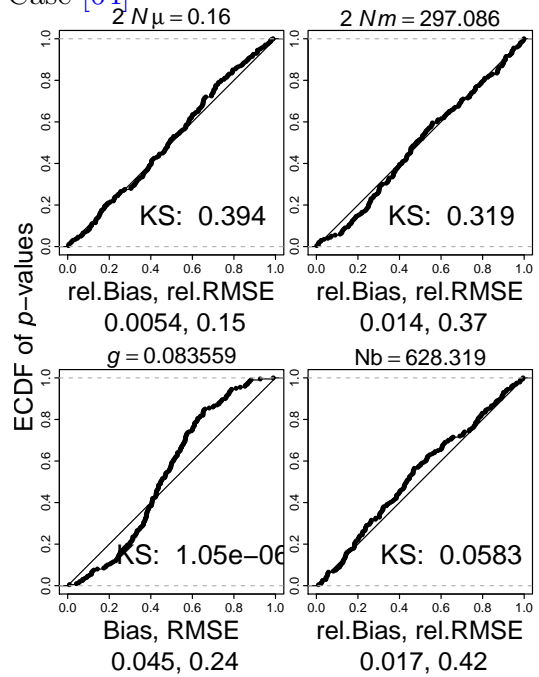

Case [65]

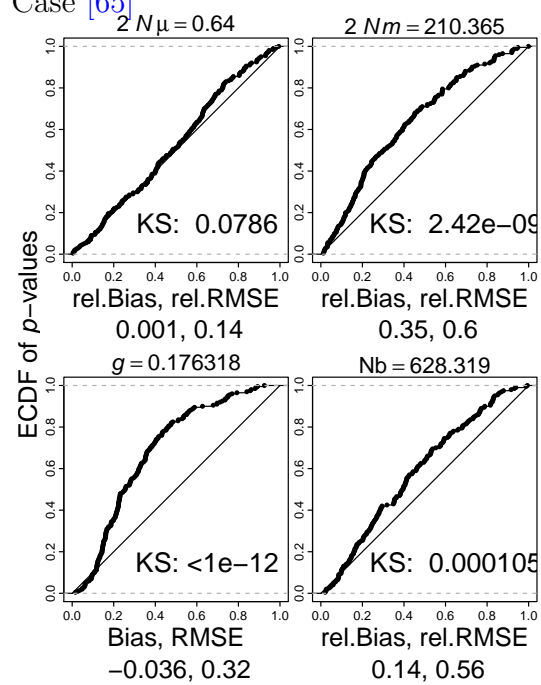

Supplement: msr262_Supplementary_Data.zip [file msr262_Supplementary_Data.zip]
